# Supplementary material for: Oxidative Stress-Induced Pentraxin 3 Expression Human Retinal Pigment Epithelial Cells Is Involved in the Pathogenesis of Age-Related Macular Degeneration
Source: MDPI journal article supplement (doi:10.3390/ijms20236028), 2019-11-29
Supplement: s1 [file s1]

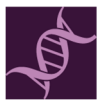

## Supplementary Results

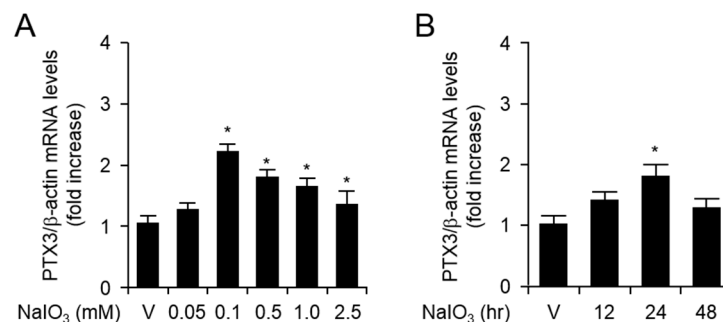

**Figure S1.** The expression of pentraxin 3 (PTX3) mRNA levels was enhanced after NaIO<sub>3</sub> administration in human RPE cells. Human retinal pigmented epithelial cell lines ARPE-19 cells were treated for 24 h in various doses of NaIO<sub>3</sub> (A). ARPE-19 cells were exposed to 100 μM NaIO<sub>3</sub>, for the indicated time points (B). Values are presented as mean ± SD, n=3. \**p* < 0.05, increased PTX3 mRNA expression after NaIO<sub>3</sub> administration vs. vehicle (V).

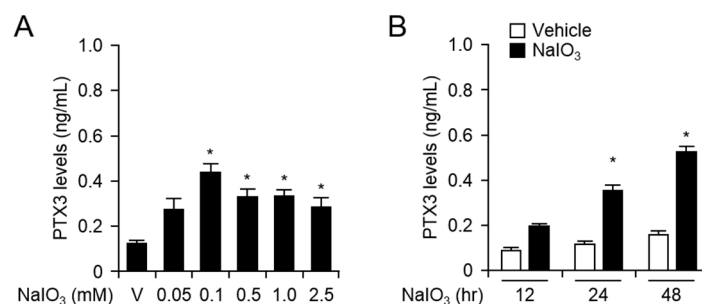

**Figure S2.** The protein levels of PTX3 were enhanced after NaIO<sub>3</sub> administration in human RPE cells. Human retinal pigmented epithelial cell lines ARPE-19 cells were treated for 48 hours in various doses of NaIO<sub>3</sub> (A). ARPE-19 cells were exposed to 100 μM, for the indicated time points supernatants were harvested and analyzed for PTX3 production (B). Values are presented as mean ± SD, *n* = 12. \**p* < 0.05, increased PTX3 after NaIO<sub>3</sub> administration vs. vehicle (V).

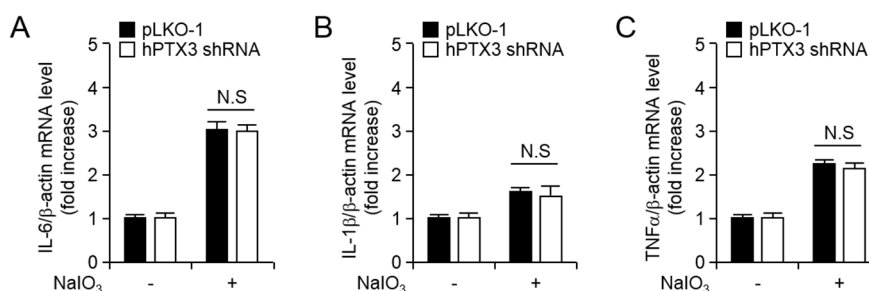

**Figure S3.** The mRNA levels of inflammatory cytokines were not enhanced hPTX3 shRNA expressing ARPE-19 cells in response to NaIO<sub>3</sub>. Total RNA was extracted from control or hPTX3 shRNA expressing ARPE-19 cells 12 h after 100 μM NaIO<sub>3</sub> administration. mRNA levels of IL-6 (A), IL-1β (B) and TNFα (C) were analyzed by quantitative real-time RT-PCR. Human β-actin was used as a control for normalization. Expression levels of each mRNA are divided by expression of β-actin and shown as a ratio of each mRNA/β-actin. Values are presented as mean ± SD, *n* = 3. N.S. indicates non-significance.
